# Supplementary material for: Plasma Metabolic Signature and Abnormalities in HIV-Infected Individuals on Long-Term Successful Antiretroviral Therapy
Source: MDPI journal article supplement (doi:10.3390/metabo9100210), 2019-09-30
Supplement: s1 [file s1]

**A.**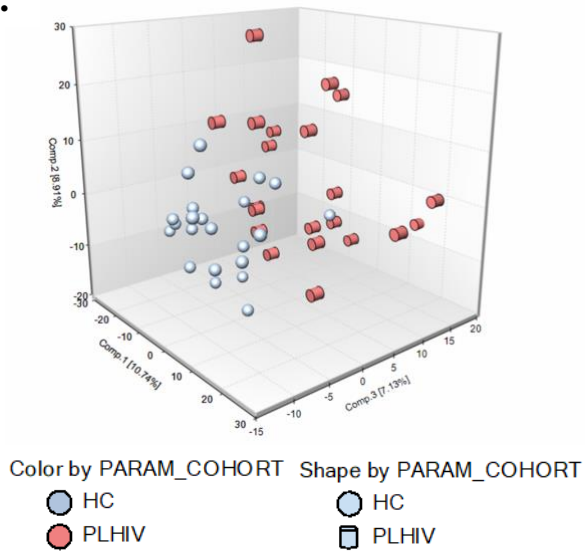**B.**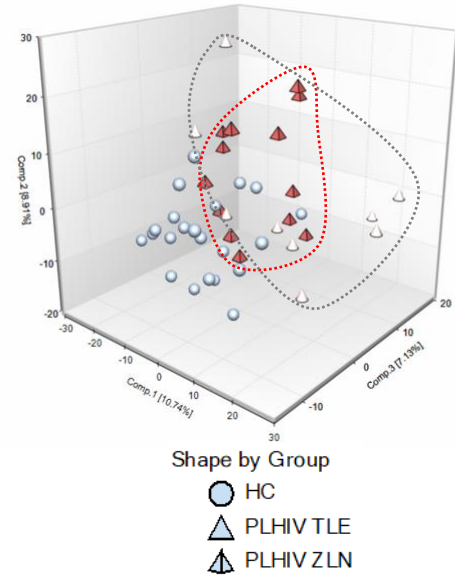

**Figure S1.** Principal component analysis (PCA). The PCA identified separation between HC and PLHIV samples with PLHIV samples separating to the north and east of HC samples. There was also some separation of samples in the PLHIV group based on treatment type: TDF/3TC/EFV (TLE) and AZT/3TC/NVP (ZLN).

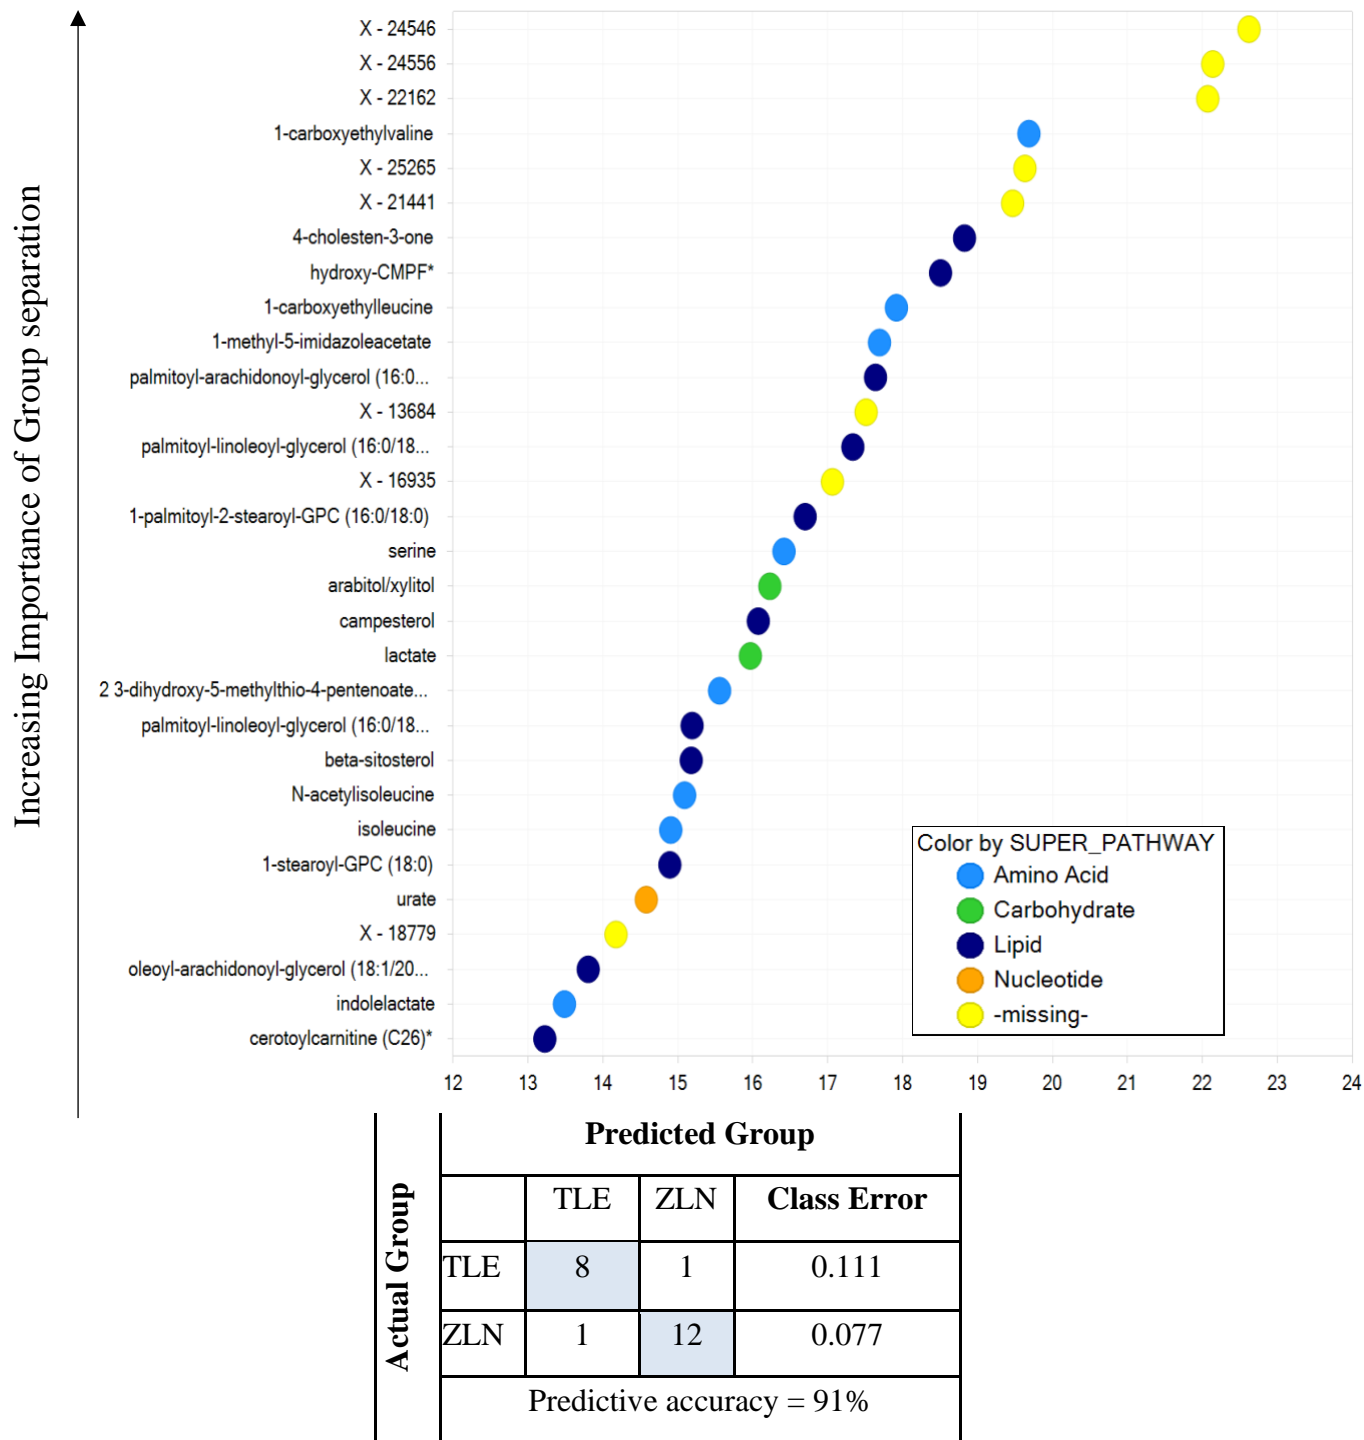

**Figure S2.** Random Forest analysis using all metabolites (unnamed and named)

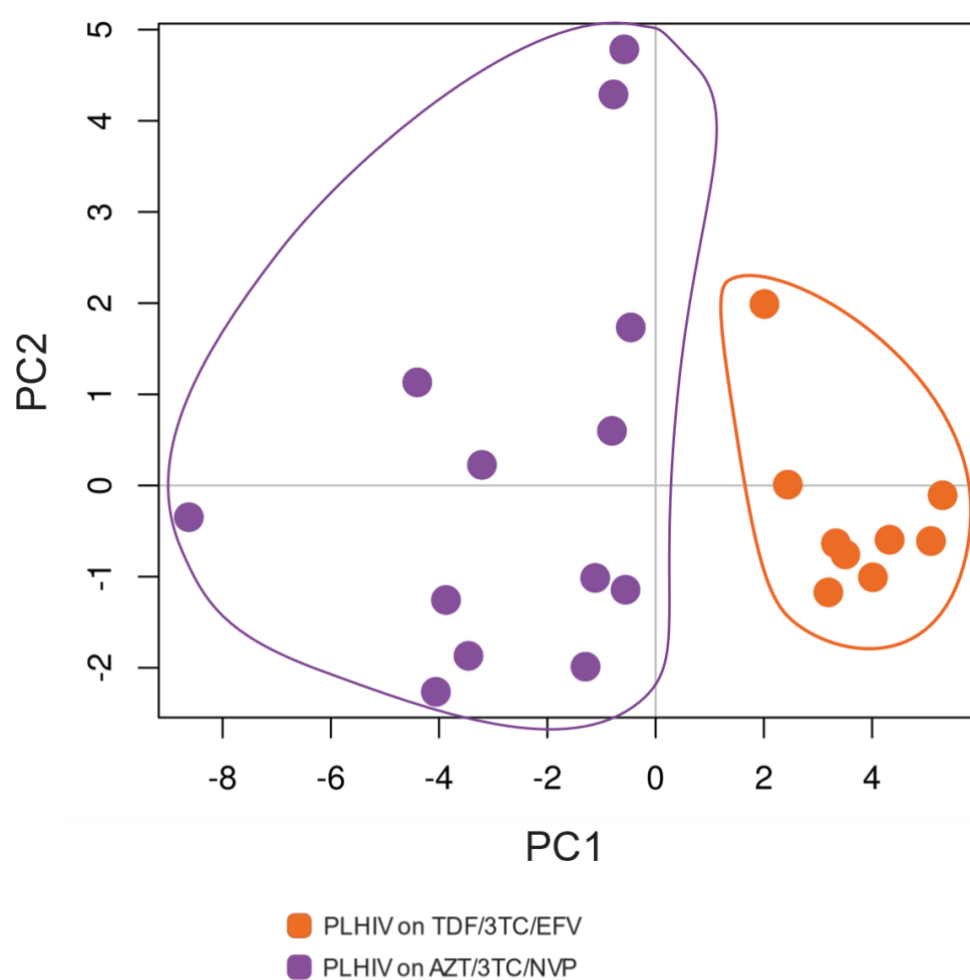

**Figure S3.** Principle component analysis of PLHIV-TLE vs. PLHIV-ZLN using the top 30 metabolites.

| Sub Pathway                                                  | Biochemical Name                                                | Fold Change |
|--------------------------------------------------------------|-----------------------------------------------------------------|-------------|
| Long Chain Saturated Fatty Acid                              | behenate (22:0)*                                                |             |
| Long Chain Polyunsaturated Fatty Acid (n3 and n6)            | mead acid (20:3n9)                                              |             |
| Fatty Acid, Dicarboxylate                                    | 3-hydroxyadipate*                                               |             |
| Fatty Acid Metabolism (Acyl Glycine)                         | eicosenedioate (C20:1-DC)*                                      |             |
|                                                              | 3-hydroxybutyrylglycine**                                       |             |
| Fatty Acid Metabolism (Acyl Carnitine, Long Chain Saturated) | palmitoylcarnitine (C16)                                        |             |
|                                                              | stearoylcarnitine (C18)                                         |             |
|                                                              | arachidoylcarnitine (C20)*                                      |             |
|                                                              | cerotoylcarnitine (C26)*                                        |             |
| Fatty Acid Metabolism (Acyl Carnitine, Monounsaturated)      | nervonoylcarnitine (C24:1)*                                     |             |
|                                                              | ximenoylcarnitine (C26:1)*                                      |             |
| Fatty Acid Metabolism (Acyl Carnitine, Dicarboxylate)        | adipoylcarnitine (C6-DC)                                        |             |
|                                                              | pimeloylcarnitine/3-methyladipoylcarnitine (C7-DC)              |             |
| Fatty Acid Metabolism (Acyl Carnitine, Hydroxy)              | (S)-3-hydroxybutyrylcarnitine                                   |             |
| Fatty Acid, Monohydroxy                                      | 2-hydroxyarachidate*                                            |             |
|                                                              | 3-hydroxyoctanoate                                              |             |
| Fatty Acid, Dihydroxy                                        | 2R,3R-dihydroxybutyrate                                         |             |
| Phospholipid Metabolism                                      | choline phosphate                                               |             |
| Phosphatidylcholine (PC)                                     | 1-palmitoyl-2-palmitoleoyl-GPC (16:0/16:1)*                     |             |
|                                                              | 1-palmitoyl-2-oleoyl-GPC (16:0/18:1)                            |             |
|                                                              | 1-palmitoyl-2-linoleoyl-GPC (16:0/18:2)                         |             |
|                                                              | 1-palmitoyl-2-dihomo-linolenoyl-GPC (16:0/20:3n3 or 6)*         |             |
|                                                              | 1-stearoyl-2-oleoyl-GPC (18:0/18:1)                             |             |
|                                                              | 1-stearoyl-2-arachidonoyl-GPC (18:0/20:4)                       |             |
|                                                              | 1,2-dilinoleoyl-GPC (18:2/18:2)                                 |             |
| Phosphatidylethanolamine (PE)                                | 1-palmitoyl-2-linoleoyl-GPE (16:0/18:2)                         |             |
|                                                              | 1,2-dilinoleoyl-GPE (18:2/18:2)*                                |             |
| Phosphatidylinositol (PI)                                    | 1-palmitoyl-2-arachidonoyl-GPI (16:0/20:4)*                     |             |
|                                                              | 1-palmitoyl-GPA (16:0)                                          |             |
| Lysophospholipid                                             | 1-linoleoyl-GPA (18:2)*                                         |             |
|                                                              | 1-oleoyl-GPC (18:1)                                             |             |
|                                                              | 1-linolenoyl-GPC (18:3)*                                        |             |
|                                                              | 1-arachidonoyl-GPC (20:4n6)*                                    |             |
|                                                              | 1-lignoceroyl-GPC (24:0)                                        |             |
| Plasmalogen                                                  | 1-(1-enyl-palmitoyl)-2-linoleoyl-GPE (P-16:0/18:2)*             |             |
|                                                              | 1-(1-enyl-palmitoyl)-2-arachidonoyl-GPE (P-16:0/20:4)*          |             |
| Diacylglycerol                                               | linoleoyl-linoleoyl-glycerol (18:2/18:2) [2]*                   |             |
|                                                              | stearoyl-arachidonoyl-glycerol (18:0/20:4) [1]*                 |             |
|                                                              | N-palmitoyl-sphingosine (d18:1/16:0)                            |             |
| Ceramides                                                    | N-stearoyl-sphingosine (d18:1/18:0)*                            |             |
|                                                              | N-palmitoyl-sphingadineine (d18:2/16:0)*                        |             |
|                                                              | N-stearoyl-sphingadineine (d18:2/18:0)*                         |             |
|                                                              | ceramide (d18:1/20:0, d16:1/22:0, d20:1/18:0)*                  |             |
|                                                              | ceramide (d18:2/24:1, d18:1/24:2)*                              |             |
|                                                              | myristoyl dihydrosphingomyelin (d18:0/14:0)*                    |             |
| Dihydrosphingomyelins                                        | palmitoyl dihydrosphingomyelin (d18:0/16:0)*                    |             |
|                                                              | behenoyl dihydrosphingomyelin (d18:0/22:0)*                     |             |
|                                                              | sphingomyelin (d18:0/20:0, d16:0/22:0)*                         |             |
| Sphingomyelins                                               | hydroxypalmitoyl sphingomyelin (d18:1/16:0(OH))**               |             |
|                                                              | tricosanoyl sphingomyelin (d18:1/23:0)*                         |             |
|                                                              | sphingomyelin (d18:2/18:1)*                                     |             |
|                                                              | sphingomyelin (d18:2/23:1)*                                     |             |
|                                                              | sphingomyelin (d18:2/24:2)*                                     |             |
|                                                              | sphingomyelin (d17:2/16:0, d18:2/15:0)*                         |             |
|                                                              | sphingomyelin (d18:1/21:0, d17:1/22:0, d16:1/23:0)*             |             |
|                                                              | sphingomyelin (d18:2/21:0, d16:2/23:0)*                         |             |
|                                                              | sphingomyelin (d18:1/22:2, d18:2/22:1, d16:1/24:2)*             |             |
|                                                              | sphingomyelin (d18:1/25:0, d19:0/24:1, d20:1/23:0, d19:1/24:0)* |             |
| Sphingosines                                                 | hexadecasphingosine (d16:1)*                                    |             |
| Sterol                                                       | beta-sitosterol                                                 |             |
|                                                              | campesterol                                                     |             |
| Progestin Steroids                                           | 5alpha-pregnan-3beta,20beta-diol monosulfate (1)                |             |
|                                                              | 5alpha-pregnan-3beta,20alpha-diol monosulfate (2)               |             |
|                                                              | 5alpha-pregnan-3beta,20alpha-diol disulfate                     |             |
| Androgenic Steroids                                          | cortisol                                                        |             |
|                                                              | 16a-hydroxy DHEA 3-sulfate                                      |             |
|                                                              | epiandrosterone sulfate                                         |             |
|                                                              | androsterone sulfate                                            |             |
|                                                              | androstenediol (3alpha, 17alpha) monosulfate (3)                |             |
|                                                              | 5alpha-androstan-3alpha,17beta-diol monosulfate (1)             |             |
|                                                              | 5alpha-androstan-3beta,17beta-diol monosulfate (2)              |             |
|                                                              | 5alpha-androstan-3beta,17beta-diol disulfate                    |             |
|                                                              | andro steroid monosulfate C19H28O6S (1)*                        |             |
| Primary Bile Acid Metabolism                                 | glyco-alpha-muricholate**                                       |             |
|                                                              | glyco-beta-muricholate**                                        |             |
| Secondary Bile Acid Metabolism                               | glycodeoxycholate                                               |             |
|                                                              | taurodeoxycholate                                               |             |
|                                                              | glycolithocholate                                               |             |
|                                                              | glycoursodeoxycholate                                           |             |
|                                                              | hyocholate                                                      |             |
|                                                              | glycohyocholate                                                 |             |

**Figure S4.** Significant metabolites in lipid metabolism. Fold change indicated changes in PLHIV compared to HC.
